# Supplementary material for: The Relation Between College Students’ Social Anxiety and Mobile Phone Addiction: The Mediating Role of Regulatory Emotional Self-Efficacy and Subjective Well-Being
Source: PubMed Central journal article supplement (PMC9108388; doi:10.3389/fpsyg.2022.861527), 2022-05-02
Supplement: Table_1.pdf [file Table_1.pdf]

## Appendix :

| Items                                                                                                                | Mean ± SD  | Normal distribution |          |
|----------------------------------------------------------------------------------------------------------------------|------------|---------------------|----------|
|                                                                                                                      |            | Skewness            | Kurtosis |
| <b>Social anxiety</b>                                                                                                |            |                     |          |
| TA <sub>1</sub> : I am afraid of failing to express the meaning when talking to other people.                        | 2.53±1.102 | -.003               | -.891    |
| TA <sub>2</sub> : I often get nervous when talking to the opposite sex.                                              | 2.65±1.158 | .099                | -.780    |
| TA <sub>3</sub> : Even though I knew I should not be nervous at a social event, I could not control myself.          | 2.89±1.129 | -.130               | -.743    |
| TA <sub>4</sub> : I get nervous for a period before going to social activities.                                      | 2.99±1.161 | -.181               | -.745    |
| TA <sub>5</sub> : I worry about blushing when interacting with other people.                                         | 2.33±1.098 | .432                | -.597    |
| TA <sub>6</sub> : I am always worried about misbehaving when dealing with people.                                    | 2.94±1.130 | -.173               | -.704    |
| TA <sub>7</sub> : As long as anyone says I'm not good, I will be sad for a long time.                                | 2.58±1.122 | .284                | -.610    |
| TA <sub>8</sub> : I often get nervous and sweat when interacting with certain people (boss, opposite sex).           | 2.50±1.106 | .288                | -.617    |
| TA <sub>9</sub> : I could not relax at a social event; even I had tried my best.                                     | 2.27±0.987 | .569                | .073     |
| TA <sub>10</sub> : I am afraid to look people in the eyes when talking.                                              | 2.17±1.006 | .530                | -.352    |
| SIC <sub>1</sub> : Even though the room is full of strangers, I will go in if I need to.                             | 2.21±0.989 | .708                | .097     |
| SIC <sub>2</sub> : After a special relationship with people, I believe that others will like me.                     | 2.80±0.968 | .097                | .037     |
| SIC <sub>3</sub> : I do not miss the chance to make new friends.                                                     | 2.64±0.983 | .022                | -.333    |
| SIC <sub>4</sub> : I am delighted with how I deal with people.                                                       | 2.73±0.877 | .056                | .379     |
| SIC <sub>5</sub> : I usually like to communicate with others.                                                        | 2.66±0.899 | .107                | .159     |
| SIC <sub>6</sub> : I have confidence in my ability to interact with people.                                          | 2.69±0.960 | .109                | -.155    |
| SIS <sub>1</sub> : I do not think people will have a good impression of me.                                          | 2.26±0.928 | .384                | .011     |
| SIS <sub>2</sub> : After attending social events, I always feel like I am not doing well at the time.                | 2.79±1.008 | -.103               | -.500    |
| SIS <sub>3</sub> : I feel that if I misbehave with others, others will look down on me.                              | 2.34±1.015 | .411                | -.323    |
| SIS <sub>4</sub> : When I interact with the opposite sex, I often worry that others will think badly of me.          | 2.39±1.059 | .374                | -.604    |
| SIS <sub>5</sub> : I always worry about losing face in front of people.                                              | 2.91±1.109 | -.098               | -.676    |
| SIS <sub>6</sub> : I'm always worried that people will think I have a poor performance when interacting with people. | 2.71±1.031 | .159                | -.470    |
| <b>Regulatory emotional self-efficacy</b>                                                                            |            |                     |          |
| POS <sub>1</sub> : Express joy when good things happen to you?                                                       | 4.09±0.831 | -1.131              | 2.116    |
| POS <sub>2</sub> : Feel gratified over achieving what you set out to do?                                             | 4.20±0.749 | -1.062              | 2.226    |
| POS <sub>3</sub> : Rejoice over your successes?                                                                      | 4.14±0.844 | -1.027              | 1.477    |
| POS <sub>4</sub> : Express enjoyment freely at parties?                                                              | 3.67±0.897 | -.253               | -.121    |
| DES <sub>1</sub> : Keep from getting dejected when you are lonely?                                                   | 3.32±0.958 | -.208               | -.205    |
| DES <sub>2</sub> : Keep from getting discouraged by strong criticism?                                                | 3.39±0.938 | -.178               | -.275    |
| DES <sub>3</sub> : Reduce your upset when you don't get the appreciation you feel you deserve?                       | 3.45±0.872 | -.198               | -.120    |
| DES <sub>4</sub> : Keep from getting discouraged in the face of difficulties?                                        | 3.68±0.862 | -.440               | .252     |
| ANG <sub>1</sub> : Manage negative feelings when reprimanded by your parents or significant others?                  | 3.36±0.929 | -.232               | -.192    |
| ANG <sub>2</sub> : Avoid getting upset when others keep giving you a hard time?                                      | 3.16±1.017 | -.154               | -.402    |
| ANG <sub>3</sub> : Get over irritation quickly for wrongs you have experienced?                                      | 3.37±0.907 | -.300               | .244     |
| ANG <sub>4</sub> : Avoid flying off the handle when you get angry?                                                   | 3.50±0.913 | -.291               | .016     |
| <b>Subjective well-being</b>                                                                                         |            |                     |          |
| PSY <sub>1</sub> : Do you feel depressed or anxious?                                                                 | 2.32±0.957 | -.898               | .352     |
| PSY <sub>2</sub> : Do you feel able to enjoy life?                                                                   | 3.68±0.949 | -.635               | .249     |
| PSY <sub>3</sub> : Do you feel you have a purpose in life?                                                           | 3.86±1.093 | -.385               | -.398    |
| PSY <sub>4</sub> : Do you feel optimistic about the future?                                                          | 3.79±1.074 | -.696               | -.089    |
| PSY <sub>5</sub> : Do you feel in control of your life?                                                              | 3.46±1.039 | -.364               | -.367    |
| PSY <sub>6</sub> : Do you feel happy with yourself as a person?                                                      | 3.88±1.007 | -.816               | .328     |
| PSY <sub>7</sub> : Are you happy with your looks and appearance?                                                     | 3.78±1.063 | -.169               | -.532    |
| PSY <sub>8</sub> : Do you feel able to live your life the way you want?                                              | 3.59±1.042 | -.338               | -.477    |
| PSY <sub>9</sub> : Are you confident in your own opinions and beliefs?                                               | 3.80±0.974 | -.577               | .035     |
| PSY <sub>10</sub> : Do you feel able to do the things you choose to do?                                              | 3.88±0.943 | -.526               | .199     |
| PSY <sub>11</sub> : Do you feel able to grow and develop as a person?                                                | 3.92±0.958 | -.802               | .479     |
| PSY <sub>12</sub> : Are you happy with yourself and your achievements?                                               | 3.59±1.023 | -.021               | -.541    |

|                                                                                                                                    |            |        |        |
|------------------------------------------------------------------------------------------------------------------------------------|------------|--------|--------|
| PHY <sub>1</sub> , Are you happy with your physical health?                                                                        | 3.78±1.036 | -.712  | .022   |
| PHY <sub>2</sub> , Are you happy with the quality of your sleep?                                                                   | 3.70±1.092 | -.737  | -.032  |
| PHY <sub>3</sub> , Are you happy with your ability to perform daily living activities?                                             | 3.95±1.000 | -.970  | .730   |
| PHY <sub>4</sub> , Are you happy that you have enough money to meet your needs?                                                    | 3.90±1.016 | -.823  | .369   |
| PHY <sub>5</sub> , Are you happy with your opportunity for exercise/ leisure?                                                      | 3.52±1.126 | -.596  | -.361  |
| PHY <sub>6</sub> , Are you happy with access to health services?                                                                   | 3.73±1.057 | -.609  | -.218  |
| PHY <sub>7</sub> , Are you happy with your ability to work?                                                                        | 3.42±0.957 | -.319  | .040   |
| INT <sub>1</sub> , Are you happy with your personal and family life?                                                               | 3.81±1.033 | -1.371 | 1.391  |
| INT <sub>2</sub> , Are you happy with your friendships and personal relationships?                                                 | 3.99±0.968 | -.946  | .764   |
| INT <sub>3</sub> , Are you comfortable about way you relate and connect with others?                                               | 3.80±0.955 | -.635  | .308   |
| INT <sub>4</sub> , Are you able to ask someone for help with a problem?                                                            | 3.56±0.980 | -.325  | -.162  |
| <b>Mobile phone addiction</b>                                                                                                      |            |        |        |
| UNC <sub>1</sub> , Your friends and family complained about your use of the mobile phone.                                          | 2.44±1.135 | .336   | -.691  |
| UNC <sub>2</sub> , You have been told that you spend too much time on your mobile phone.                                           | 2.40±1.156 | .493   | -.580  |
| UNC <sub>3</sub> , You have tried to hide from others how much time you spend on your mobile phone.                                | 1.90±1.175 | 1.102  | .134   |
| UNC <sub>4</sub> , You have received mobile phone bills you could not afford to pay.                                               | 1.56±1.085 | 1.992  | 2.575  |
| UNC <sub>5</sub> , You find yourself engaged on the mobile phone for longer period of time than intended.                          | 2.26±1.263 | .071   | -1.024 |
| UNC <sub>6</sub> , You have attempted to spend less time on your mobile phone but are unable to.                                   | 2.01±1.203 | .405   | -.787  |
| UNC <sub>7</sub> , You can never spend enough time on your mobile phone.                                                           | 2.33±1.213 | .534   | -.656  |
| ABS <sub>1</sub> , When out of range for some time, you become preoccupied with the thought of missing a call.                     | 2.22±1.229 | .587   | -.846  |
| ABS <sub>2</sub> , You find it difficult to switch off your mobile phone.                                                          | 2.54±1.428 | .355   | -1.273 |
| ABS <sub>3</sub> , You feel anxious if you have not checked for messages or switched on your mobile phone for some time.           | 2.14±1.243 | .816   | -.447  |
| ABS <sub>4</sub> , You feel lost without your mobile phone.                                                                        | 2.18±1.247 | .754   | -.525  |
| ABS <sub>5</sub> , If you don't have a mobile phone, your friends would find it hard to get in touch with you.                     | 2.29±1.239 | -.009  | -.959  |
| AVO <sub>1</sub> , You have used your mobile phone to talk to others when you were feeling isolated.                               | 2.71±1.257 | .125   | -1.022 |
| AVO <sub>2</sub> , You have used your mobile phone to talk to others when you were feeling lonely.                                 | 2.81±1.220 | .063   | -.950  |
| AVO <sub>3</sub> , You have used your mobile phone to make yourself feel better when you were feeling down.                        | 2.76±1.183 | -.044  | -.821  |
| INE <sub>1</sub> , You find yourself occupied on your mobile phone when you should be doing other things, and it causes a problem. | 2.57±1.153 | .232   | -.743  |
| INE <sub>2</sub> , Your productivity has decreased as a direct result of the time you spend on the mobile phone.                   | 2.64±1.155 | .169   | -.776  |

---

Note: TA, tension and anxiety; SIC, social interaction confidence; SIS, social interaction sensitivity; POS, positive affect; DES, despondency and distress; ANG, anger and irritation; PSY, psychological well-being; PHY, physical well-being; INT, interpersonal relationship well-being; UNC, uncontrolled addiction; ABS, abstinent addiction; AVO, avoidant addiction; INE, inefficient addiction.
